# Supplementary material for: On the complexity and dynamics of in vivo Cisplatin–DNA adduct formation using HPLC/ICP-MS
Source: Royal Society of Chemistry journal article supplement (doi:10.1039/c2mt20128c), 2012-01-01

## Supplementary Information

For isotopic dilution analysis the following equations were applied.

$$F = \frac{\ln\left(\frac{R_{meas}}{R_{real}}\right)}{\Delta m} \quad \text{Equation 1: Determination of mass bias factor.}$$

F - mass bias factor per mass unit

R - isotope ratio

Δm - mass difference between isotopes

$$c_{Sp} = c_s \frac{m_s}{m_{Sp}} \cdot \frac{M_{Sp}}{M_s} \cdot \frac{A_s}{A_{Sp}} \left( \frac{R_m - R_{Sp}}{1 - R_m R_{Sp}} \right) \quad \text{Equation 2: Determination of spike concentration.}$$

c<sub>S/Sp</sub> - concentration of the standard and the spike

m<sub>S/Sp</sub> - mass taken from standard and the spike

M<sub>S/Sp</sub> - elemental atomic weights of the element in the standard and the spike

A<sub>S/Sp</sub> - isotope abundance of standard and spike

R<sub>m/S/Sp</sub> - isotope ratio measured, for the standard and for the spike

$$R_m = \frac{R_{meas}}{\exp(F \Delta m)} \quad \text{Equation 3: Determination of isotope ratio.}$$

R<sub>m</sub> - corrected isotope ratio

R<sub>meas</sub> - measured isotope ratio

F - mass bias factor

Δm - mass difference between isotopes

$$I_{corr/meas}(cps) = I_{meas}(cps) \cdot \frac{F}{\exp(\Delta m R_{meas})} \quad \text{Equation 4: Correction of cps for isotopic distribution.}$$

I<sub>corr/meas</sub>(cps)- corrected and measured intensities in cps

F - mass bias factor

Δm - mass difference between isotopes

R<sub>meas</sub> - measured isotope ratio

$$T(s) = 1 - \frac{I_{meas}}{I_{meas} + I_{corr}} \quad \text{Equation 5: Determination of detector dead time.}$$

T(s) - dead time of detector in sec

I<sub>meas/corr</sub> - measured and corrected intensities in cps

$$MF_S = c_{Sp} d_{Sp} F_{Sp} \frac{AW_S}{AW_{Sp}} \frac{A_{Sp}^b}{A_S^a} \left( \frac{R_m - R_{Sp}}{1 - R_m R_S} \right)$$

**Equation 6:** Determination of mass flow.

MFs - mass flow sample

c<sub>Sp</sub>d<sub>Sp</sub>F<sub>Sp</sub> - mass flow spike

AW - atomic weight

A - isotope abundance

R<sub>m</sub> - corrected isotope ratio

R<sub>S/Sp</sub> - isotope ratio of sample/spike

Relative intensity [%]

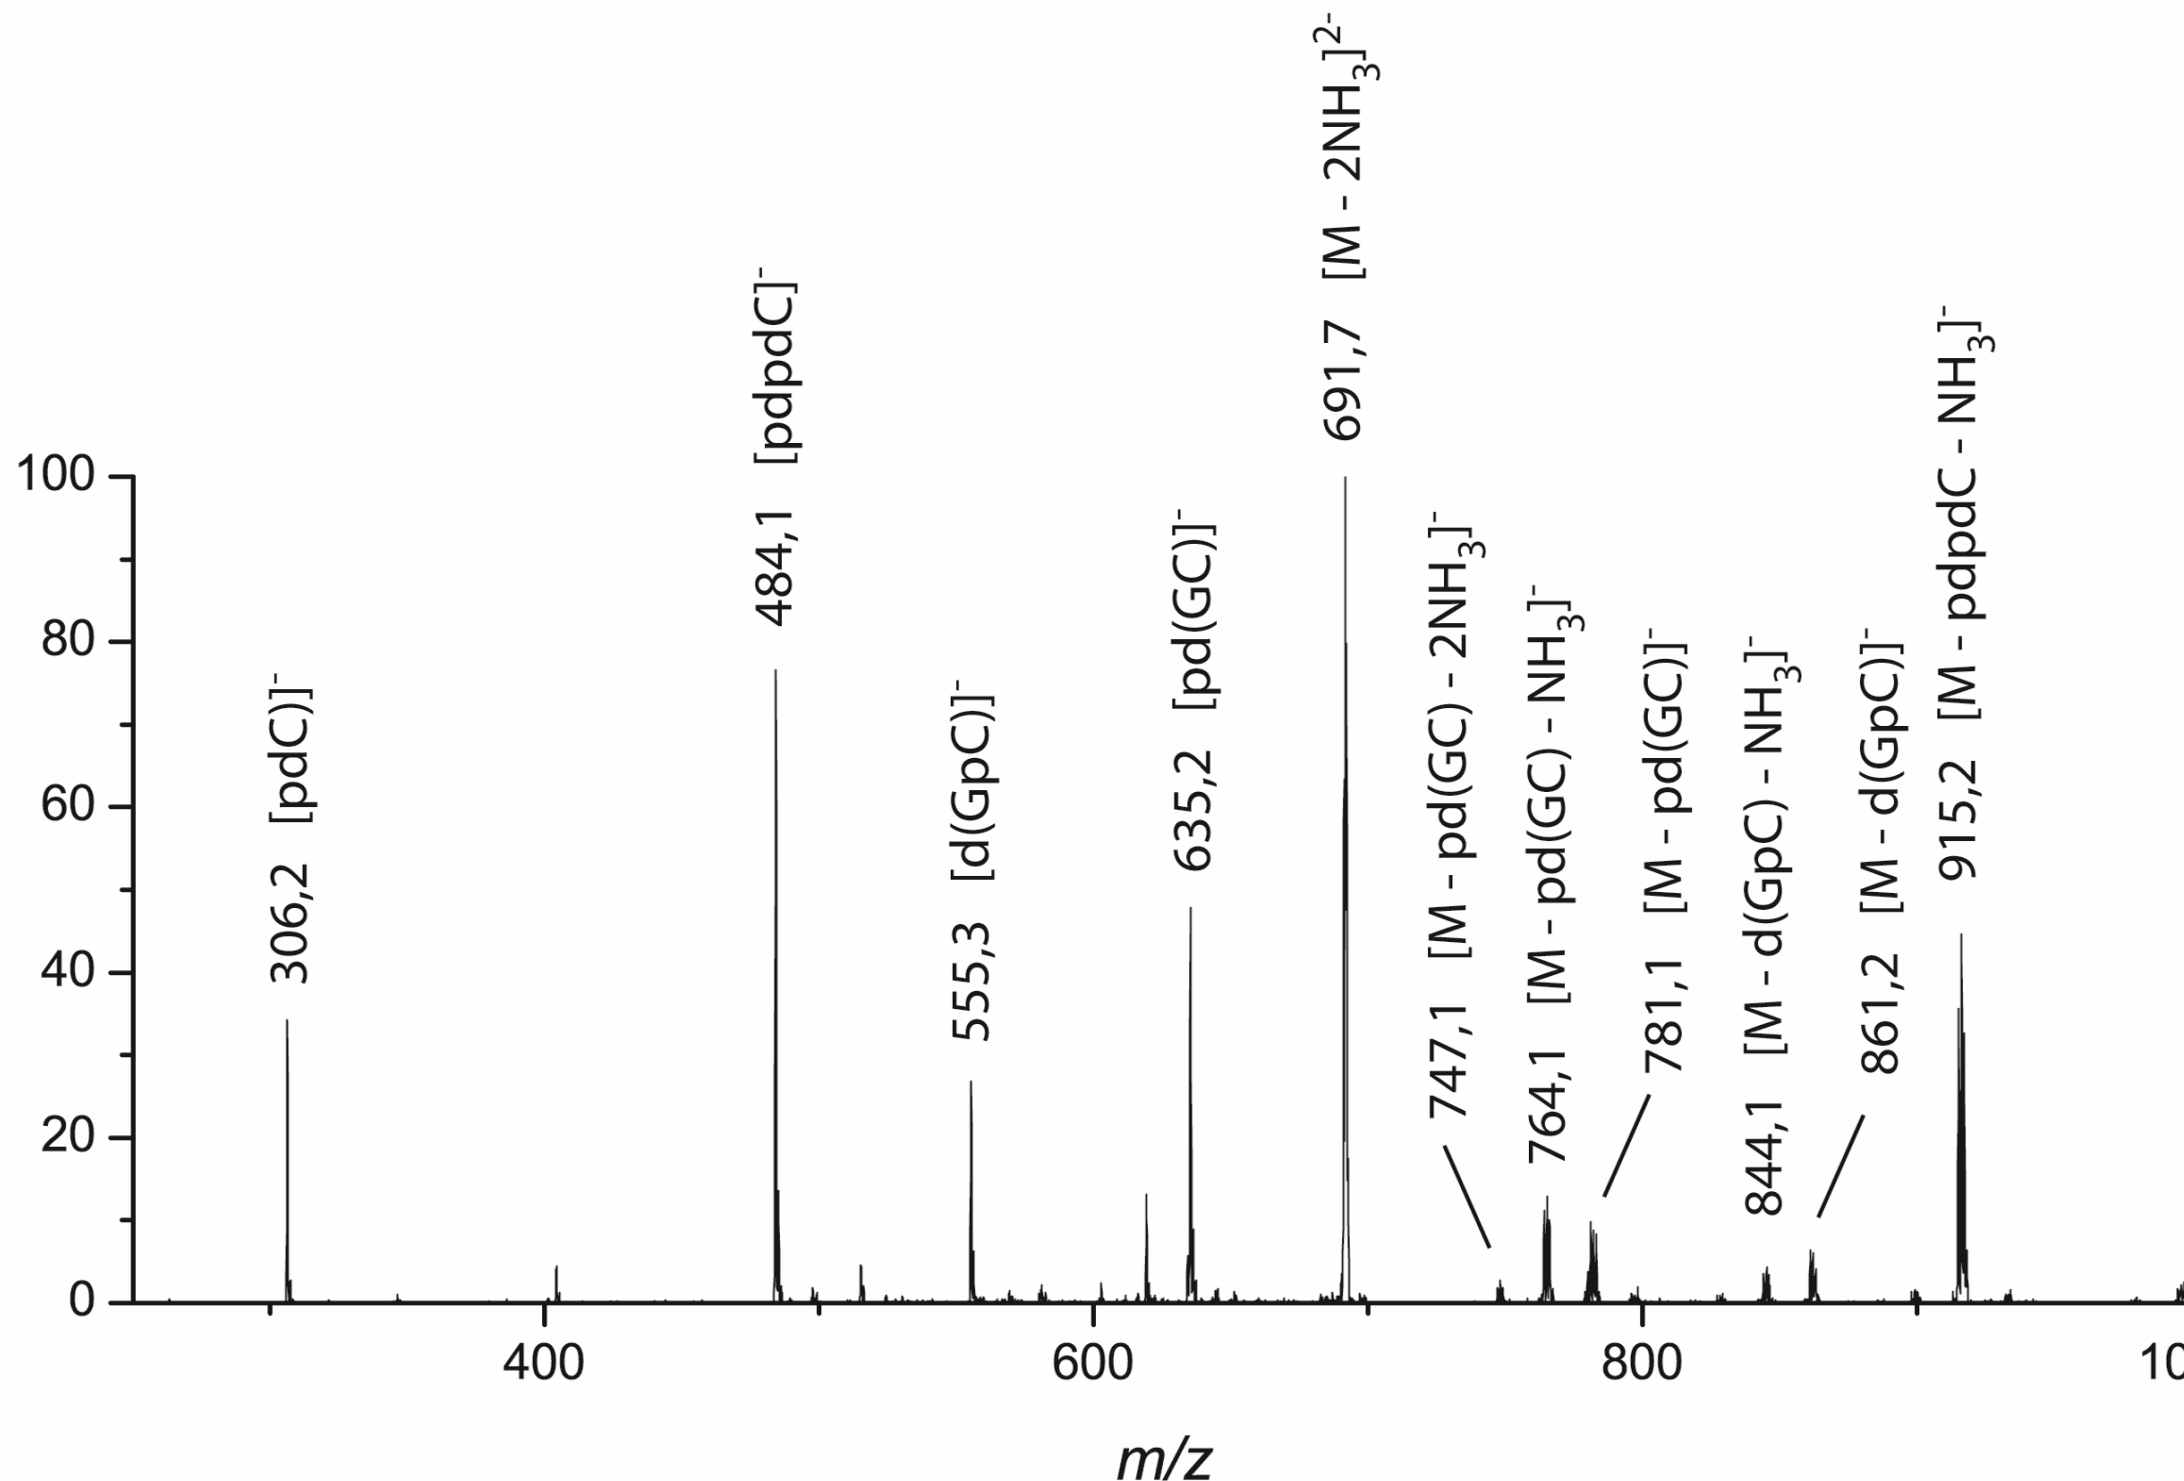

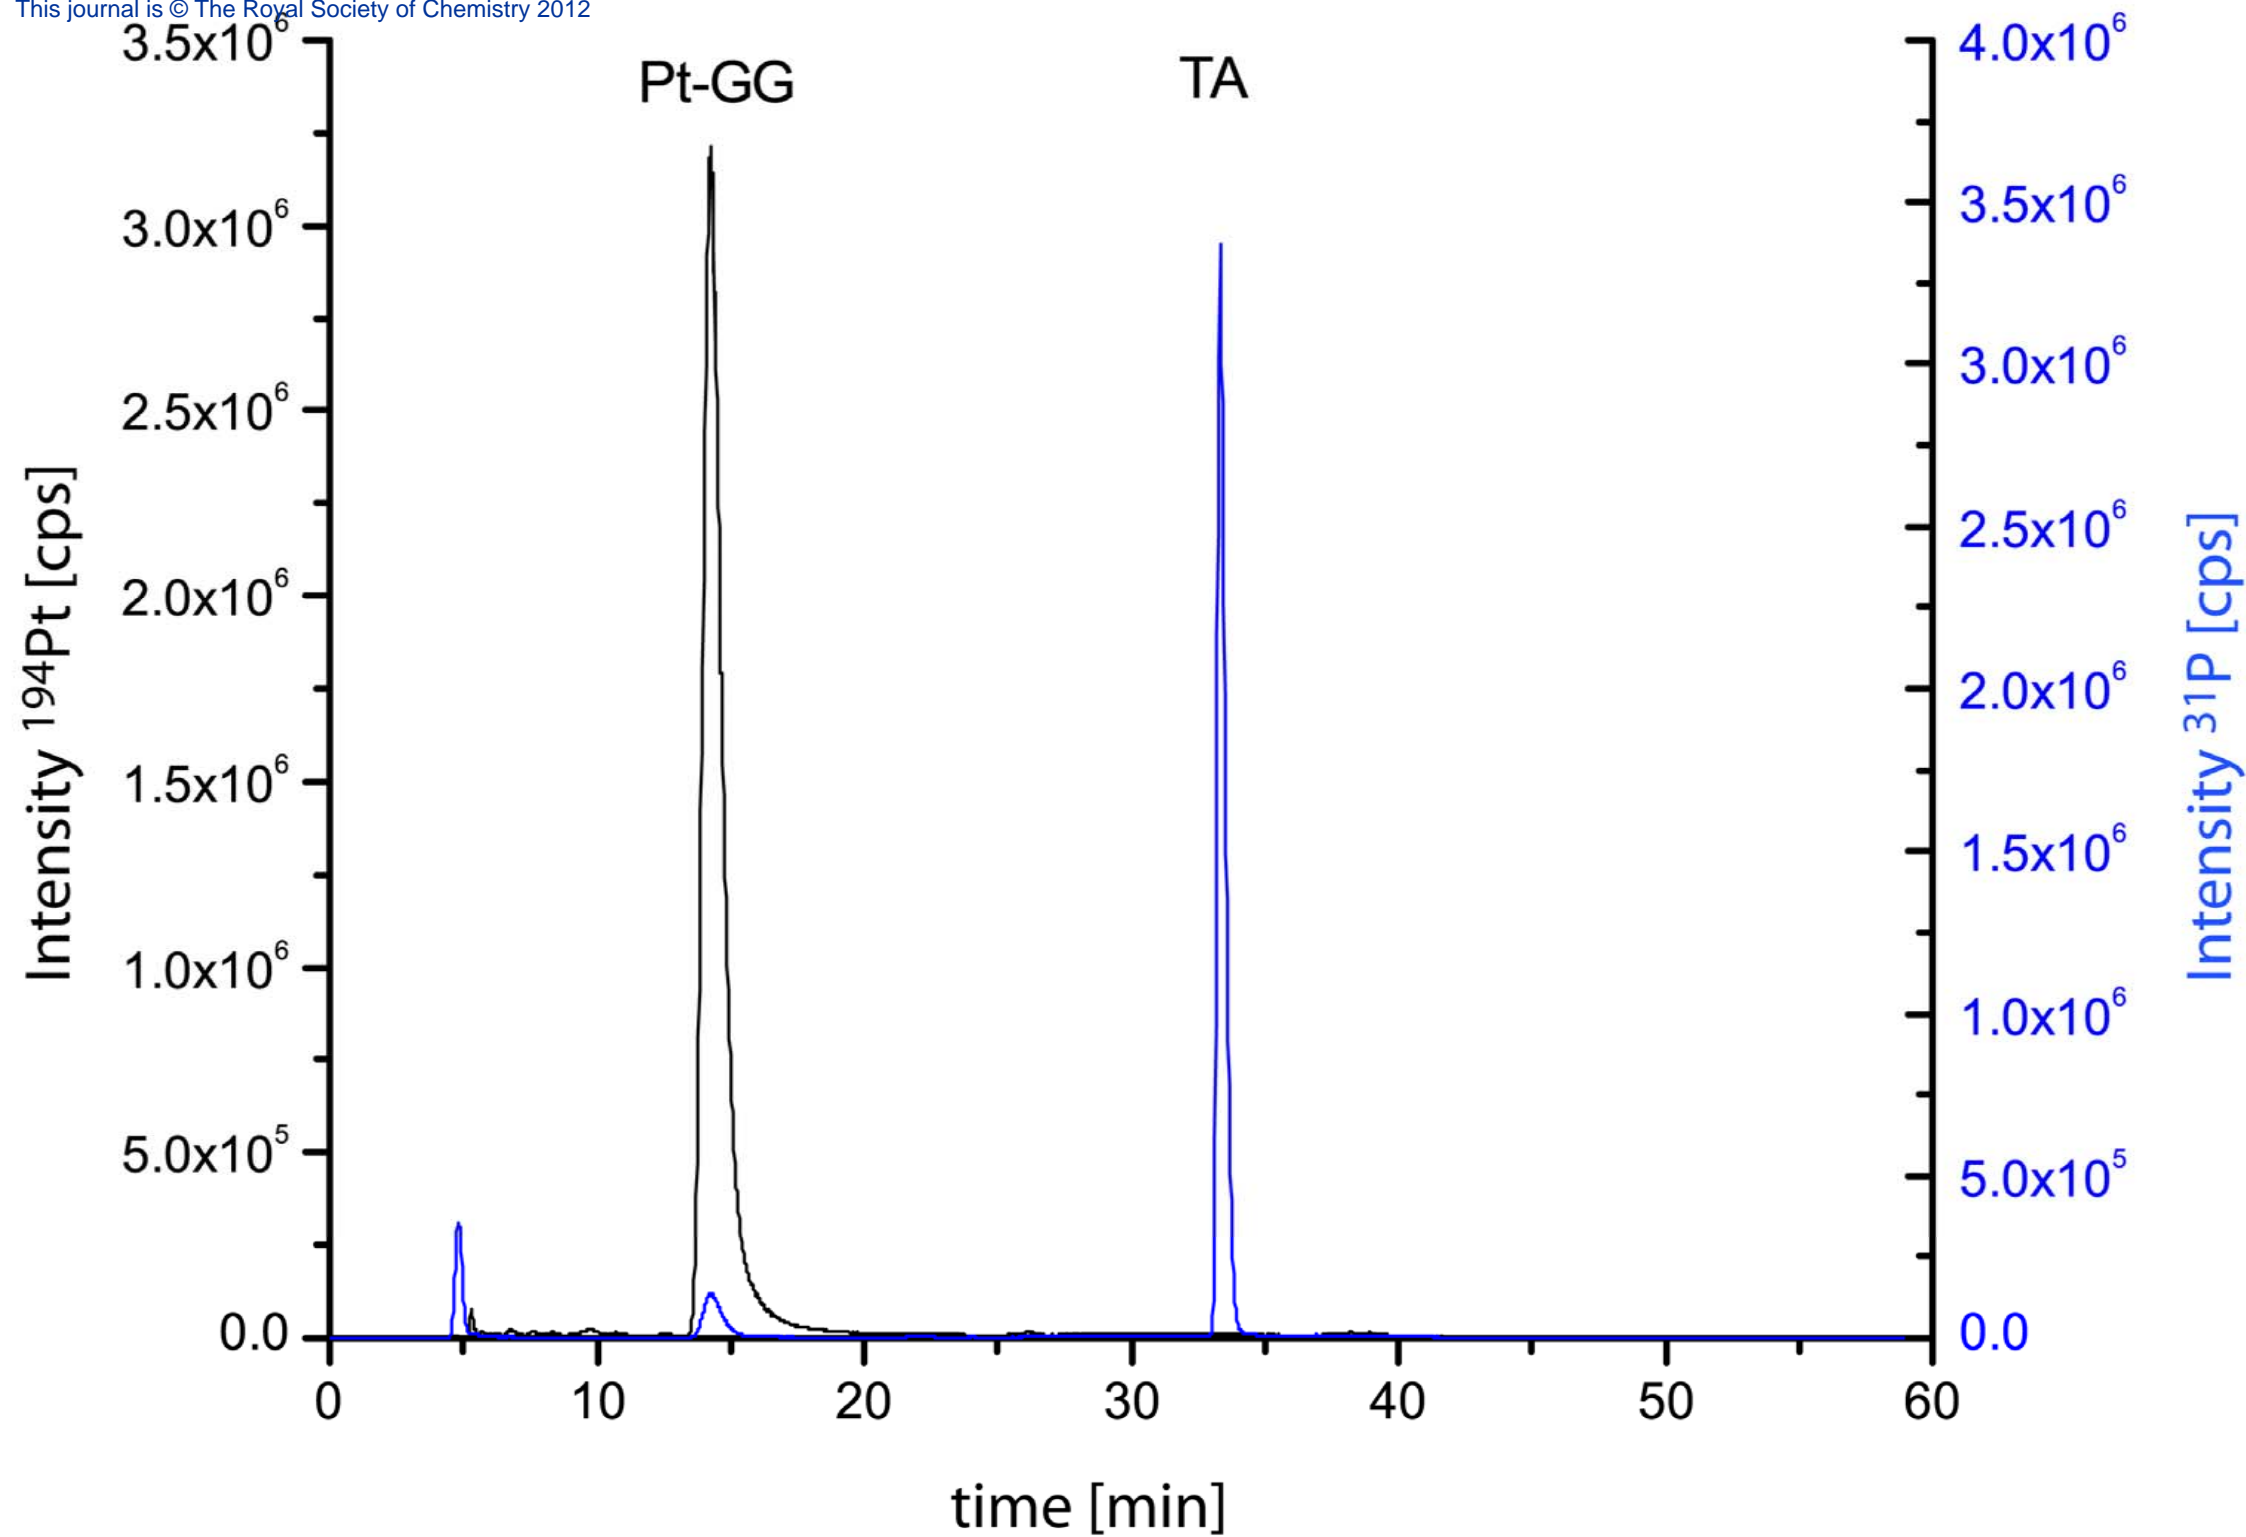

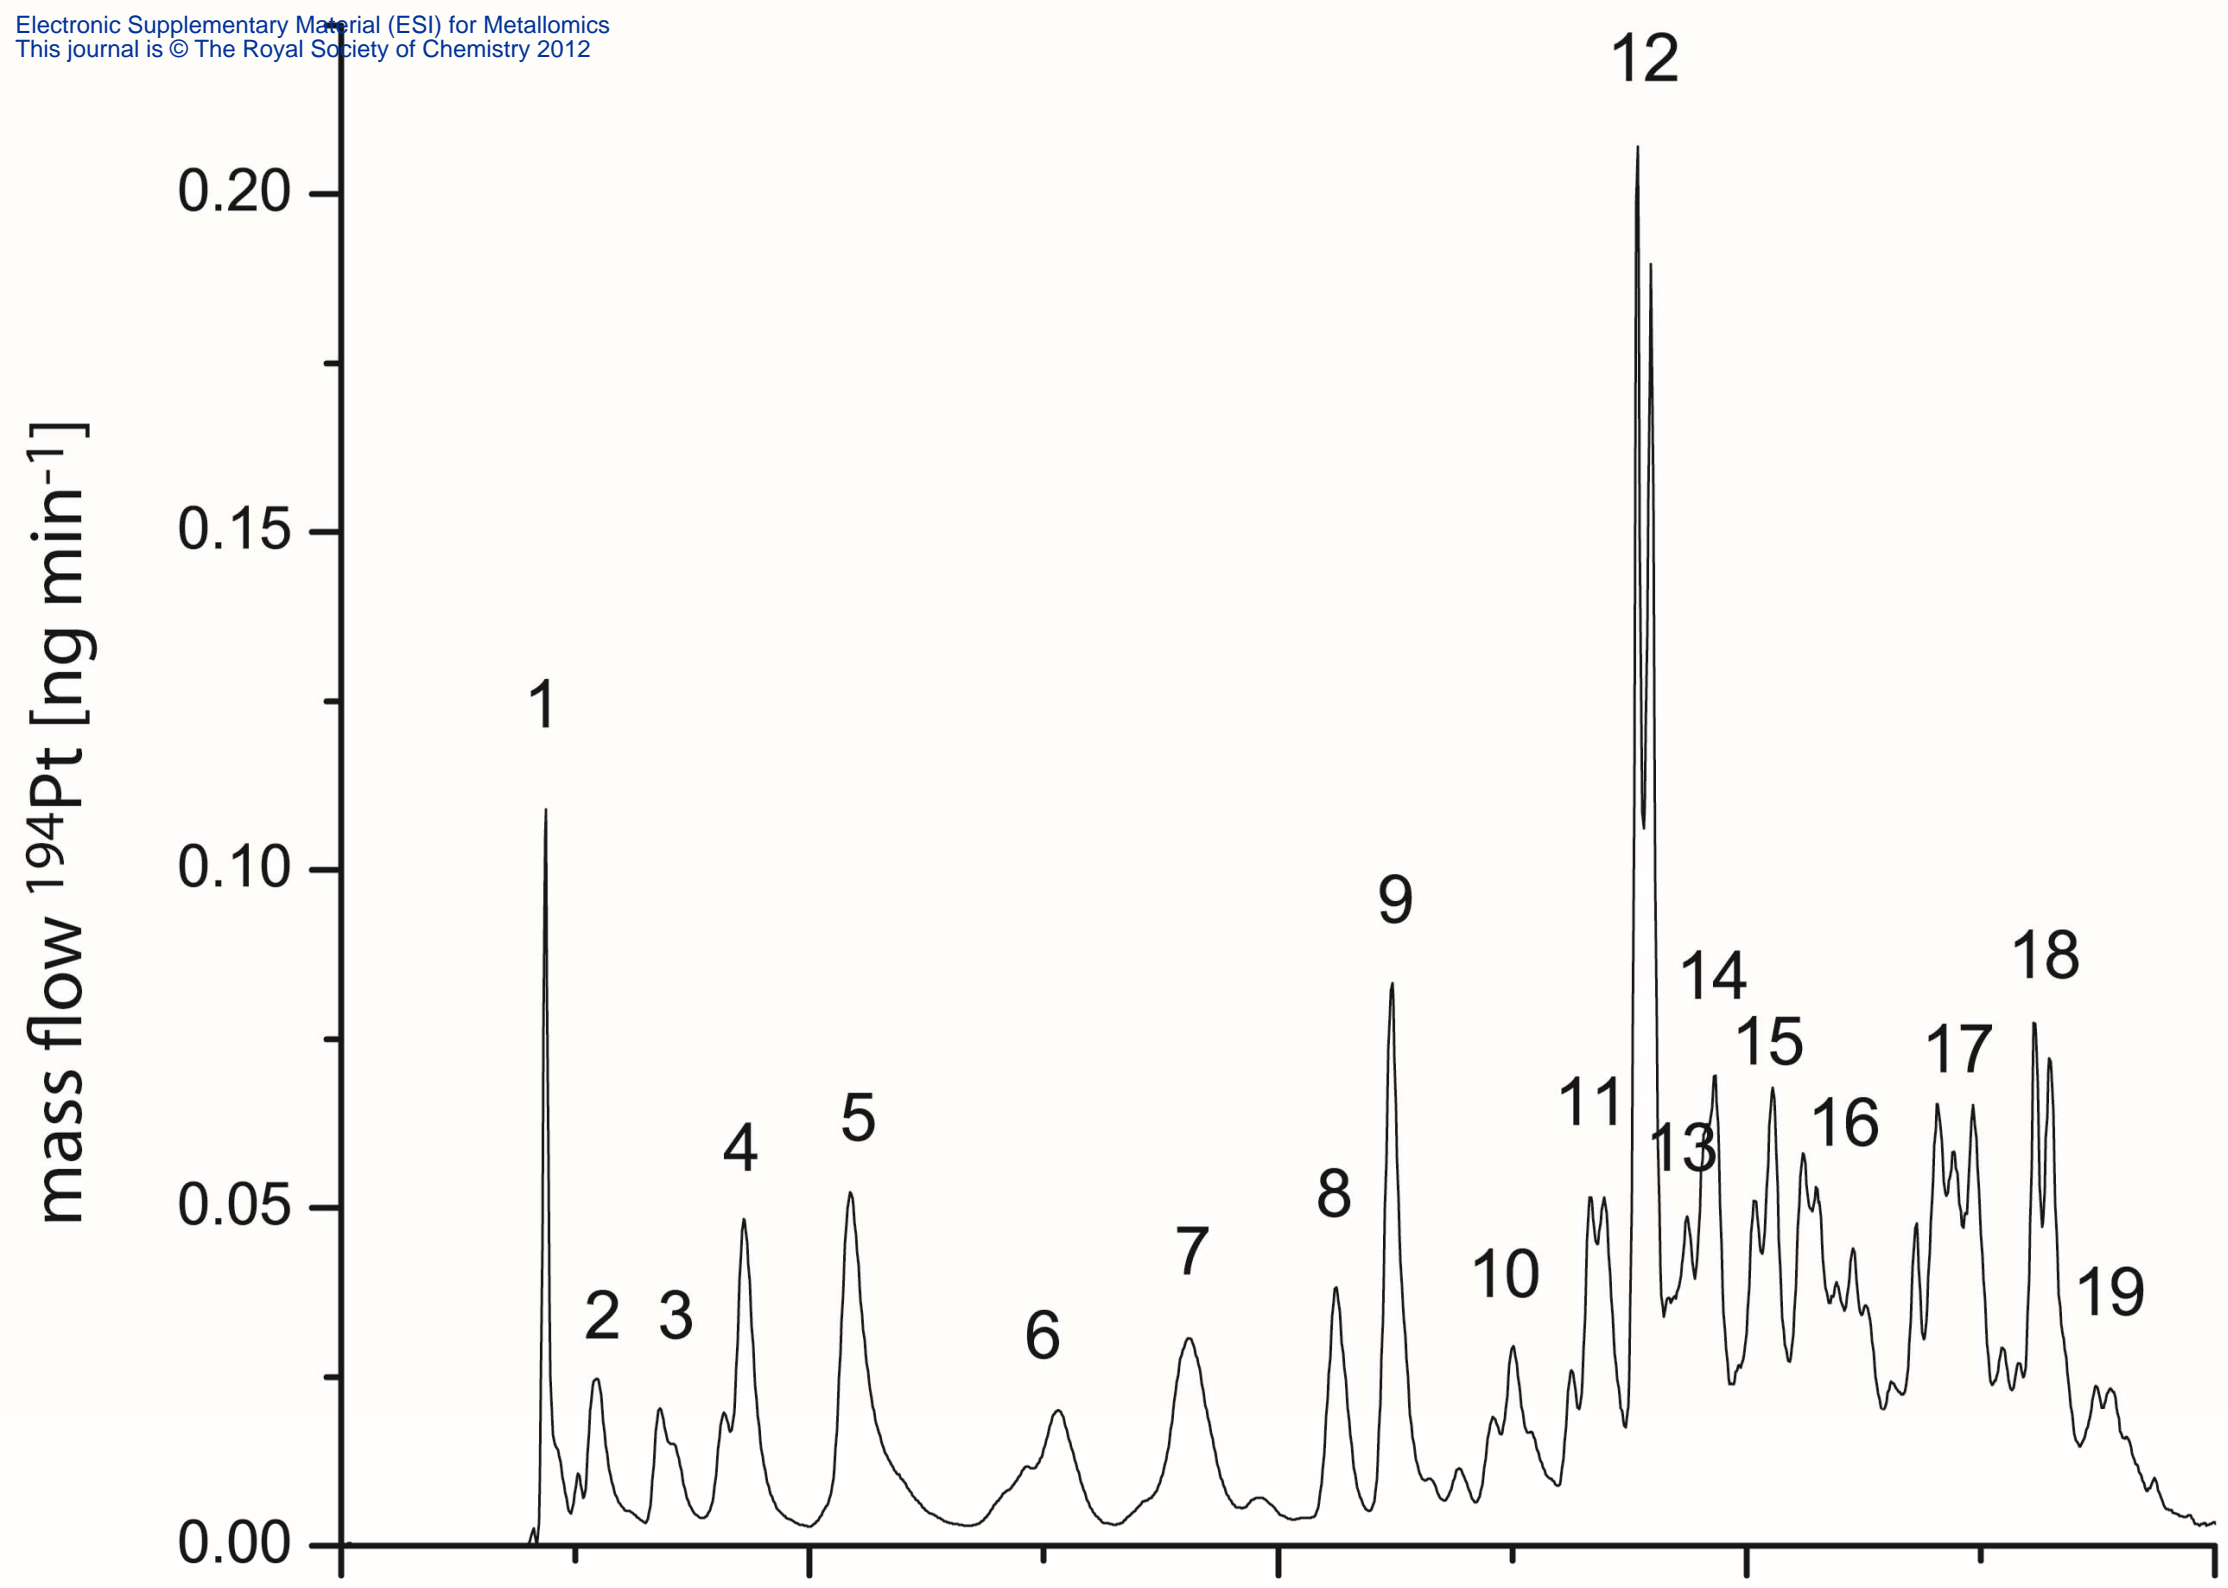

absorption [mAU]

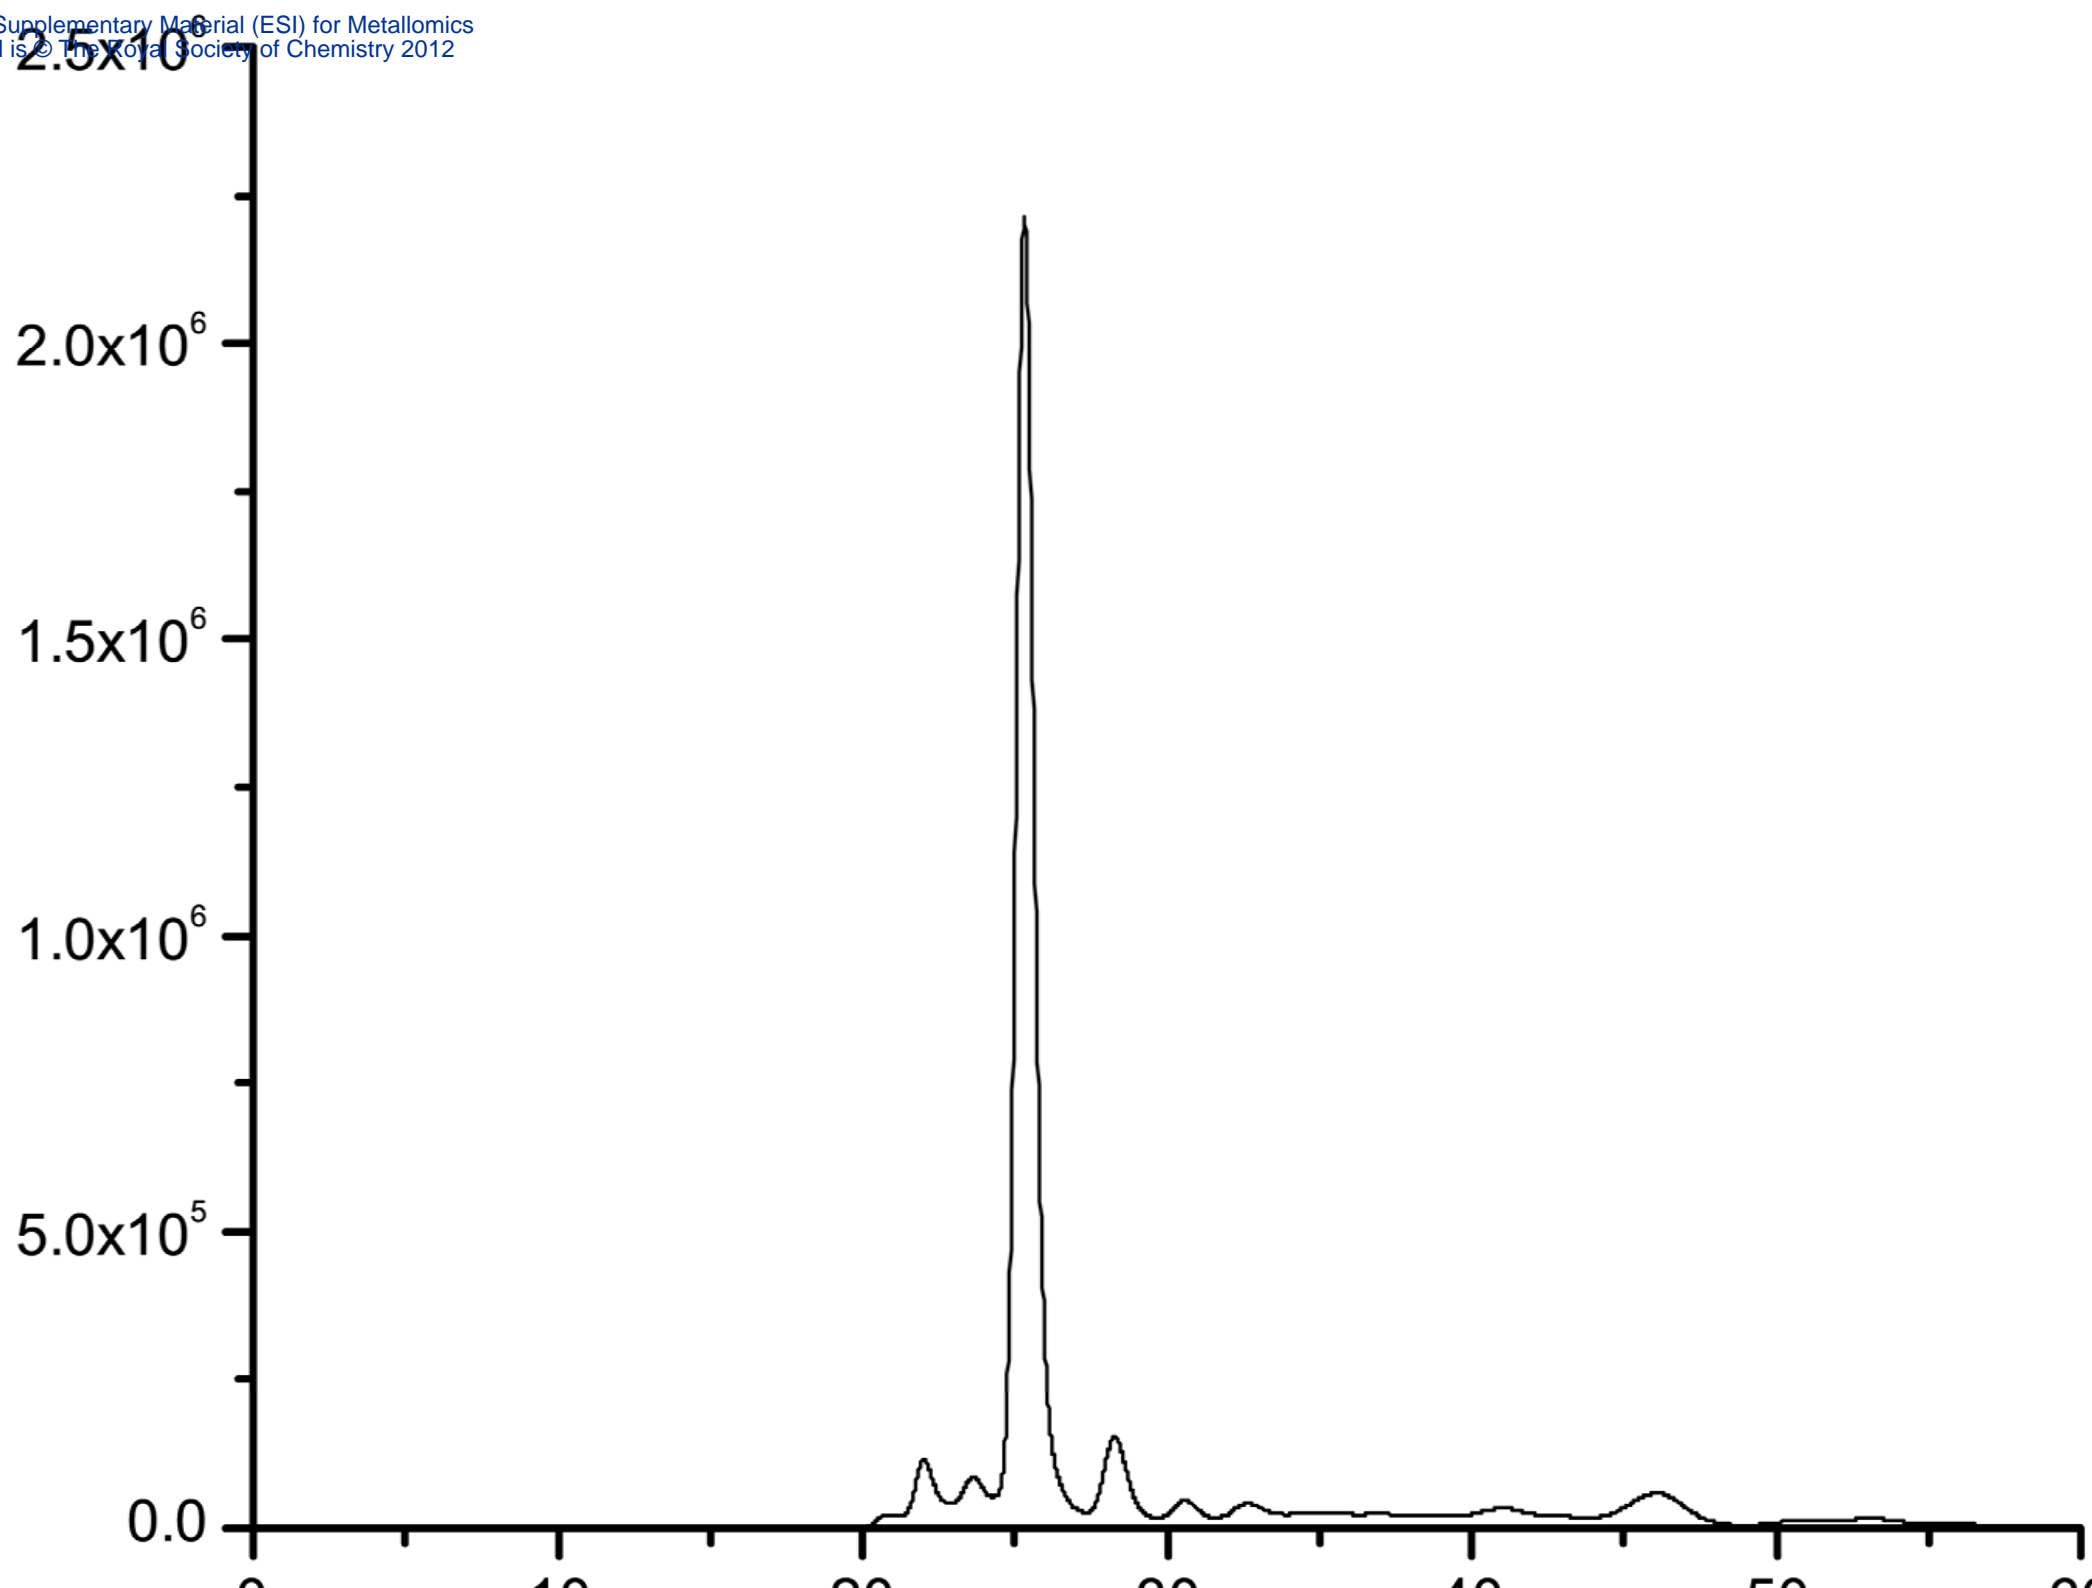

Supplementary Figure 2 top

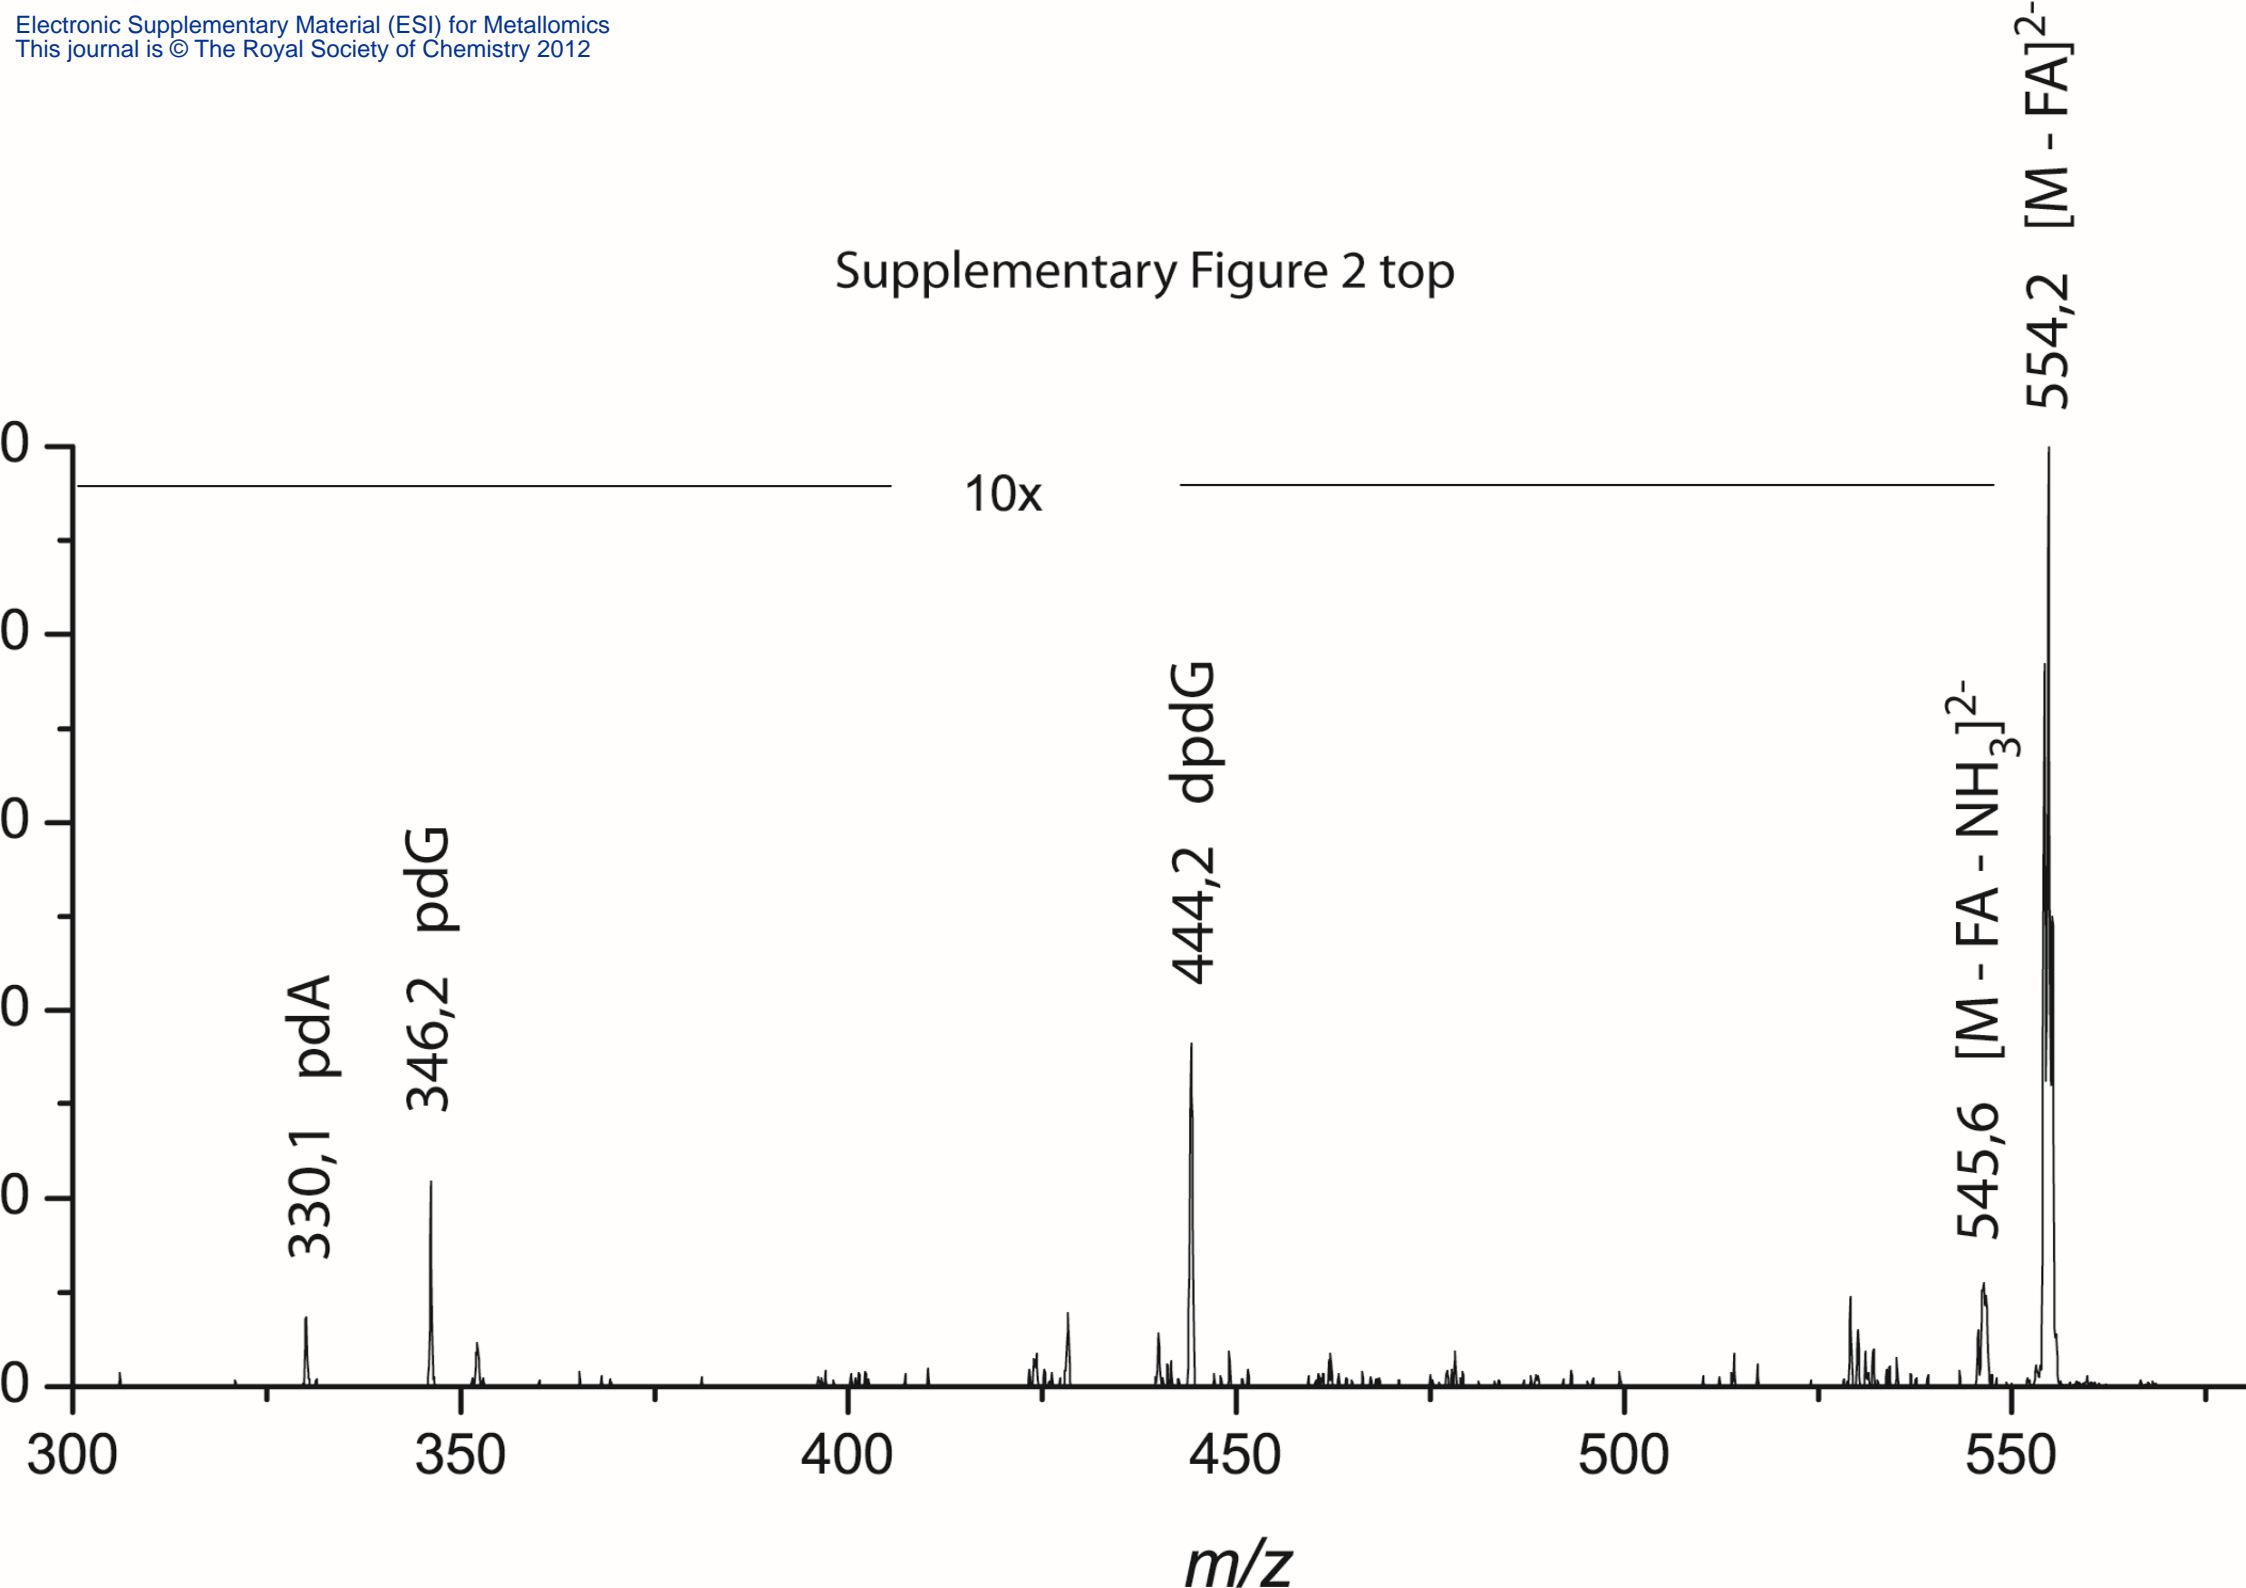

Supplement: c2mt20128c.pdf [file c2mt20128c.pdf]
